# Supplementary material for: Interleukin-10 induces expression of CD39 on CD8+T cells to potentiate anti-PD1 efficacy in EGFR-mutated non-small cell lung cancer
Source: PubMed Central journal article supplement — J Immunother Cancer. 2022 Dec 21;10(12):e005436. doi: 10.1136/jitc-2022-005436 (PMC9772697; doi:10.1136/jitc-2022-005436), 2022-12-21
Supplement: jitc-2022-005436supp001.pdf [file jitc-2022-005436supp001.pdf]

# Interleukin-10 induces expression of CD39 on CD8<sup>+</sup>T cells to potentiate anti-PD1 efficacy in EGFR-mutated non-small cell lung cancer

## Graphic Abstract

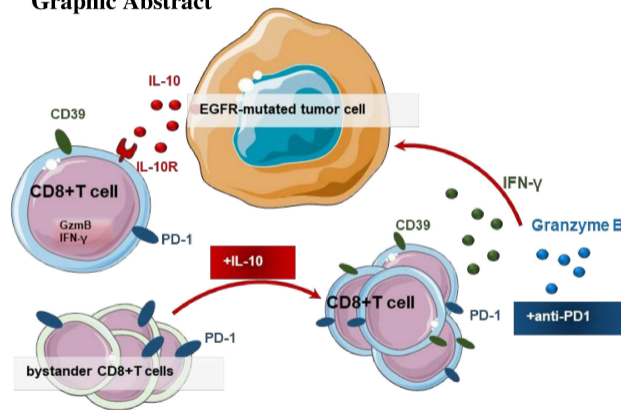

## Authors

Meng Qiao, Fei Zhou, Xinyu Liu, Tao Jiang, Haowei Wang, Yijun Jia, Xuefei Li, Chao Zhao, Lei Cheng, Xiaoxia Chen, Shengxiang Ren, Hongcheng Liu, Caicun Zhou

## Correspondence

caicunzhou@163.com

## In Brief

*EGFR*-mutated tumors are lack of IL-10 to induce the expression of CD39 on CD8<sup>+</sup>T cell with cytotoxic and exhausted features that can be re-invigorated upon ICI treatment. Combining IL-10 and PD-1 blockade demonstrate promising anti-tumor effect in *EGFR*-mutated mouse models.
