# Supplementary material for: Interleukin-10 induces expression of CD39 on CD8+T cells to potentiate anti-PD1 efficacy in EGFR-mutated non-small cell lung cancer
Source: HighWire-hosted journal article supplement (doi:10.1136/jitc-2022-005436), 2022-12-01
Supplement: jitc-2022-005436supp002_data_supplement.xlsx [file jitc-2022-005436supp002_data_supplement.xlsx]

## Sheet: Sheet1
Table S1. Baseline characteristics of patients with collected tissue specimen
	EGFR-MUT (N=19)	EGFR-WT (N=11)	p value
Gender
Male	5	9	0.007
Female	14	2
Age
>=65	7	7	0.257
<65	12	4
Smoking History
Yes	2	5	0.068
No	17	6
