# Supplementary material for: Interleukin-10 induces expression of CD39 on CD8+T cells to potentiate anti-PD1 efficacy in EGFR-mutated non-small cell lung cancer
Source: HighWire-hosted journal article supplement (doi:10.1136/jitc-2022-005436), 2022-12-01
Supplement: jitc-2022-005436supp003_data_supplement.xlsx [file jitc-2022-005436supp003_data_supplement.xlsx]

## Sheet: Sheet1
Table S2. Characteristics of patients treated with PD-1/PD-L1 inhibitors
	No. of patients (n=36)
Median age, years (range)	68 (40 to 89)
Gender, n (%)
Male	33 (91.7)
Female	3 (8.3)
ECOG PS, n (%)
0-1	34 (94.4)
2	2 (5.6)
Smoking history, n (%)
Yes	14 (38.9)
No	22 (61.1)
Pathology, n (%)
adenocarcinoma	17 (47.2)
others	19 (52.8)
Stage, n (%)
IIIB-IV	25 (69.4)
postoperative recurrent	11 (30.6)
Treatment line of ICI, n (%)
First-line	20 (55.6)
Second-line	7 (19.4)
≥Third	9 (25.0)
Treatment strategy, n (%)
monotherapy	17 (47.2)
combination therapy	19 (52.8)
