# Supplementary figures and images for: Interleukin-10 induces expression of CD39 on CD8+T cells to potentiate anti-PD1 efficacy in EGFR-mutated non-small cell lung cancer
Source: PubMed Central journal article supplement — J Immunother Cancer. 2022 Dec 21;10(12):e005436. doi: 10.1136/jitc-2022-005436 (PMC9772697; doi:10.1136/jitc-2022-005436), 2022-12-21

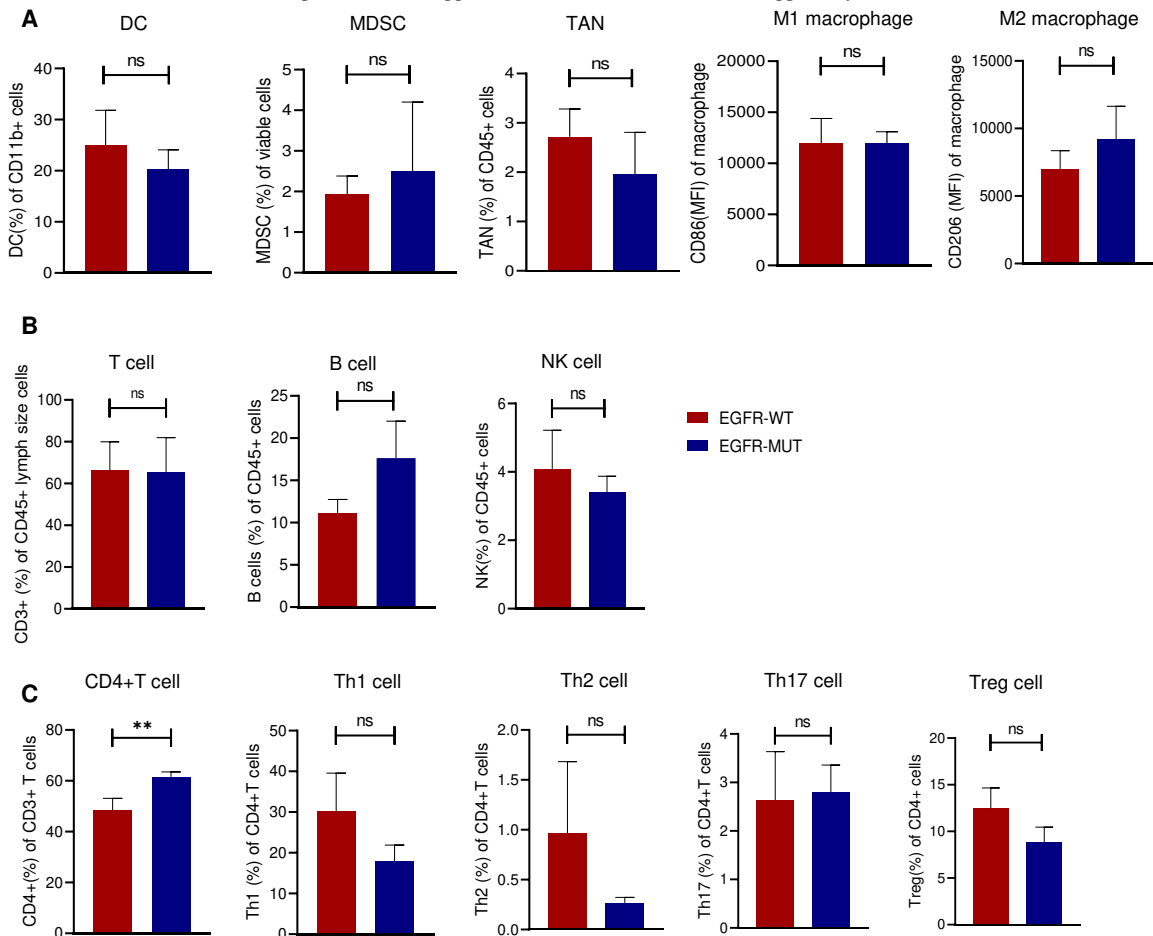

Supplementary figure 3.

Supplement: jitc-2022-005436supp008.pdf [file jitc-2022-005436supp008.pdf]
